# Supplementary material
Source: PubMed Central journal article supplement (PMC5206515)
Supplement: pnas.1609569114.sapp.pdf [file pnas.1609569114.sapp.pdf]

1 ***Supplementary Information Table of Contents***

|    |                                                                                               |    |
|----|-----------------------------------------------------------------------------------------------|----|
| 2  | Materials .....                                                                               | 2  |
| 3  | Methods .....                                                                                 | 2  |
| 4  | Spheroid Production.....                                                                      | 2  |
| 5  | Preparing Fluorescent Spheroids .....                                                         | 3  |
| 6  | Microfluidic Device Fabrication.....                                                          | 3  |
| 7  | On-chip monomer infusion .....                                                                | 4  |
| 8  | On-chip membrane disruption and staining .....                                                | 5  |
| 9  | Islet extraction.....                                                                         | 5  |
| 10 | Vasculature Dye Conjugation .....                                                             | 6  |
| 11 | Islet Vasculature Imaging .....                                                               | 6  |
| 12 | On-chip Visualization in 3D .....                                                             | 6  |
| 13 | Volume shrinkage and imaging depth quantification .....                                       | 7  |
| 14 | Diffusion versus flow rate quantification.....                                                | 8  |
| 15 | Islet Vasculature Analysis and Quantification.....                                            | 9  |
| 16 | Supplementary Figures .....                                                                   | 10 |
| 17 | Figure S1: Tissue Preservation depends on Monomer Concentration. ....                         | 11 |
| 18 | Figure S2: Membrane Disruption Completes in Minutes .....                                     | 12 |
| 19 | Figure S3: Imaging Depth is Dramatically Increased after on-chip Clearing .....               | 13 |
| 20 | Figure S4: Interstitial Fluid Exchange under Induced Flow or Diffusion.....                   | 16 |
| 21 | Figure S5: HUVEC Migration to Spheroid Core varies with Cancer Cell Type. ....                | 18 |
| 22 | Figure S6: Proof-of-Concept Drug Screening Trial.....                                         | 19 |
| 23 | Supplementary Table 1: Variable-slope Sigmoidal fitting characteristics from Figure S4b ..... | 21 |
| 24 | Supplementary Code .....                                                                      | 22 |
| 25 | SC1: “Z_stack_area_generation.m” .....                                                        | 22 |
| 26 | SC2: “Collect_Volume_and_Data.m” .....                                                        | 29 |
| 27 | SC3: “connectivity_analysis.m” .....                                                          | 32 |
| 28 |                                                                                               |    |
| 29 |                                                                                               |    |

1 ***Materials***

2 All cell lines used in spheroid production were purchased from ATCC, with the exception of  
3 tdTomato-expressing B16F10 (donated by Dr. Steven Proulx), GFP-expressing U87MG (donated  
4 by Dr. Gang Zheng), GFP-expressing human umbilical vein endothelial cells (HUVECs,  
5 purchased from Angio-Proteomie), tdTomato-expressing MDA-MB-231 (donated by Dr. Michael  
6 Detmar). Culture media, trypsin-EDTA, and CFDA-SE and CellTracker Red cellular stains were  
7 purchased from Life-Technologies. Poly-hydroxyethylmethacrylate (poly-HEMA) was purchased  
8 from Sigma-Aldrich. Monomer solution was prepared with either 0%, 2%, 4%, or 8% acrylamide  
9 (BioBasic), mixed with 4% paraformaldehyde (Electron Microscopy Sciences), and 2.5% of 2,2'-  
10 azobis[2-(2-imidazolin-2-yl)propane] Dihydrochloride radical initiator (Va-044, from Wako  
11 Chemicals) in PBS. Clearing solution was prepared with 4% sodium dodecylsulfate (SDS) in  
12 200mM sodium borate (pH 8.5 with pre-dissolved NaOH in deionized water). Refractive Index  
13 Matching solution (RIMS) was prepared with 88% Iohexol (purchased from AK Scientific), 2.5%  
14 1,4-diazabicyclo[2.2.2]octane (Sigma-Aldrich), 50 mM sodium borate at pH 8.5, and 0.01%  
15 sodium azide.

16 ***Methods***

17 ***Spheroid Production***

18 Spheroids were produced from the MCF-7, MDA-MB-435, B16F10 (endogenously expressing  
19 tdTomato), U87MG (endogenously expressing GFP) cell lines, and with HUVECs. Cells were  
20 grown to 80% confluence in a T75 cell culture flask, and incubated for 5 minutes with 0.25%  
21 Trypsin-EDTA at 37°C to release them into solution. After removal of excess trypsin via  
22 centrifugation at 300g for 5 mins, cells were diluted in complete media (RPMI with 10% FBS and

1 1X Penicillin-streptomycin for MDA-MB-435 cell line, DMEM with 10% FBS and 1X Penicillin-  
2 streptomycin for MCF-7, U87MG cell lines, and GlutaMAX DMEM with 10% FBS and 1X  
3 Penicillin-streptomycin for B16F10 cell line) to 10,000 cells/mL. Using this mixture, 100  $\mu$ L (1000  
4 cells) were added to each well of a round-bottom 96-well plate that was previously coated with 50  
5  $\mu$ L of 2.5% poly-HEMA in 95% ethanol. Cells were centrifuged at 1800 rpm for 10 minutes at  
6 4°C, and subsequently grown for 3 days inside a 37°C incubator.

### 7 ***Preparing Fluorescent Spheroids***

8 Cells that were not endogenously expressing fluorescent proteins were stained with CFDA-SE, or  
9 with CellTracker Red prior to spheroid formation. After release from the T75 cell culture flask,  
10 the cells were incubated with 10  $\mu$ M of staining solution at 37°C for 20 mins. After washing with  
11 sterile PBS (300g for 5 minutes), cells were diluted in complete media to 10,000 cells/mL, and  
12 spheroids were produced from them as previously described.

### 13 ***Microfluidic Device Fabrication***

14 The microfluidic chip design was originally designed for murine islets of Langerhans, taken with  
15 permission from Silva *et al.*<sup>30</sup> For devices intended for use with tumour spheroids, all dimensions  
16 were doubled, measuring 600  $\mu$ m at the ‘mouth’ of the spheroid capture wells, 100  $\mu$ m at the outlet  
17 of the capture wells, and an average of 350  $\mu$ m in channel height. Polydimethylsiloxane (PDMS)  
18 microfluidic devices were fabricated using standard soft lithography techniques. SU-8 negative  
19 photoresist (Microchem) was spin coated onto a silicon wafer and soft baked at 65°C for 8 minutes,  
20 95°C for 70 minutes, and 65°C again for 8 minutes . After selective exposure through a UV  
21 photomask, the photoresist was further baked at 65°C for 5 minutes, 95°C for 25 minutes, and  
22 65°C for 5 minutes again. The SU-8 was developed for 30 minutes, and the height of the features

1 was measured with an optical profilometer (Bruker Contour GT-K). Using this silicon master,  
2 Silgard 184 silicone elastomer was mixed with the supplied curing agent (DowCorning) at a 10:1  
3 ratio (by weight), and allowed to solidify on the silicon master under applied vacuum for 1 hour at  
4 room temperature. The temperature was then raised to 80°C for 3 hours. After solidification, the  
5 silicon master was cooled to room temperature and the PDMS was carefully peeled off of the  
6 master. Glass cover slips were then sonicated in 1 M HCl for 10 minutes, followed by sonication  
7 in acetone for 10 minutes, followed by an isopropanol rinse, and a methanol rinse. Clean the dust  
8 off of the PDMS pieces with repeated application of scotch tape. Both the PDMS pieces and the  
9 glass cover slips were then treated with oxygen plasma for 2 minutes and quickly bonded together.  
10 The devices were briefly heated to 60°C to further promote bonding.

### 11 *On-chip monomer infusion*

12 The microfluidic device was first briefly flushed with ethanol, followed by a second flush with  
13 spheroid-conditioned media, or by iBMHH buffer (125 mM NaCl, 5.7 mM KCl, 2.5 mM CaCl<sub>2</sub>,  
14 1.2 mM MgCl<sub>2</sub>, 10 mM HEPES, 0.1% BSA, 11 mM glucose) for islet experiments. Microtissues  
15 were loaded via gravity flow, and confocal images were taken with a Zeiss LSM 710 microscope.  
16 The monomer solution was infused at 600-800 μL/hr (200 μL/hr for islets) for 20 mins, then the  
17 flow was stopped while another set of post-monomer infusion confocal images were taken. The  
18 tubes leading out of the chip were clamped shut, and the chip was disconnected from the syringe  
19 pump (New Era) and incubated at 37°C for 2 hours to gel the monomer. After gelation, a brief  
20 PBS rinse (iBMHH for islets) was gently flushed through the device to restart flow. This is  
21 necessary to flush out the excess monomer that has gelled in the device. Post-gelation confocal  
22 images were taken.

### 1 ***On-chip membrane disruption and staining***

2 After monomer infusion and gelation, the MDA-MB-435 spheroids in the microfluidic device were  
3 infused with clearing solution for 7-10 minutes at 600-800  $\mu\text{L/hr}$ , followed by a 20 minute wash  
4 with PBS. The SDS infusion was omitted for control spheroids. Both membrane-disrupted and  
5 non-membrane-disrupted spheroids were stained with phalloidin-488 at 0.165  $\mu\text{M}$  for 20 minutes),  
6 DAPI (0.1  $\mu\text{g/mL}$ ) and 6 M transferrin-647, for their actin, nuclear DNA, and transferring  
7 receptors respectively at 600-800  $\mu\text{L/hr}$  for 20 minutes per stain, followed by a 10 minute PBS  
8 rinse. Confocal images were taken again before RIMS was infused at 600-800  $\mu\text{L/hr}$  for 10  
9 minutes, after which the microtissues became transparent, and more sets of confocal images were  
10 taken. For on-chip live/dead staining, a fixable Near IR LIVE/DEAD stain (Life Technologies,  
11 L10119) was infused at 400  $\mu\text{L/hr}$  for 1 hour, followed by a PBS rinse at the same flow rate for 20  
12 minutes. This live/dead staining was done *before* monomer infusion, since it discriminates between  
13 live and dead cells by the intactness of their cellular membranes.

### 14 ***Islet extraction***

15 C57/Bl6 mice were anesthetized with 50  $\mu\text{L}$  of a 100 mg/mL ketamine and 20 mg/mL xylazine  
16 mixture via intraperitoneal injection. The pancreas was excised, mechanically diced in cold HBSS,  
17 and digested for 10-15 minutes in 1 mg/mL collagenase P (10mL total volume), under vigorous  
18 shaking conditions at 37°C. After digestion, the islets were handpicked and placed in RPMI  
19 supplemented with 10% FBS, 1X penicillin-streptomycin, 11 mM glucose. Islets were incubated  
20 at 37°C until they were infused onto microfluidic device for clarifying treatment and imaging.

### 1 ***Vasculature Dye Conjugation***

2 Dye conjugation performed according to Sindhvani et al.(31), and transcribed with permission  
3 here: Alexa Fluor 647 conjugated Griffonia Simplicifolia Lectin 1 (GSL1-A647) was prepared by  
4 adding 100  $\mu\text{L}$  of 10 mg/mL unconjugated GSL-1 in 100 mM Sodium Bicarbonate buffer (pH 8.3)  
5 to 100  $\mu\text{g}$  of lyophilized Alexa Fluor 647 NHS ester. The mixture was vortexed and incubated at  
6 room temperature overnight and purified by size exclusion through a NAP-5 column (Sigma  
7 GE17-0853-01) and further washed with PBS and concentrated using Amicon 3 kDa cutoff  
8 centrifugal filters (Millipore, UFC500324). Degree of labelling was determined by measuring  
9 absorbance at 647 nm and 260 nm after completing purification and concentration steps. Degree  
10 of labelling varied from batch to batch between 4-6 dyes per molecule.

### 11 ***Islet Vasculature Imaging***

12 Prior to monomer infusion, GSL1-A647 was infused at 0.1 mg/mL at 200  $\mu\text{L/hr}$  for 25 minutes.  
13 After a brief iBMHH rinse, monomer was infused at 200  $\mu\text{L/hr}$  and the rest of the on-chip clearing  
14 process proceeded as previously described. SytoxGreen was used to stain the islet nuclei, and was  
15 infused for 30minutes at 200  $\mu\text{L/hr}$  at a concentration of 1  $\mu\text{M}$ , just prior to RIMS infusion.  
16 Clearing with SDS was not found to affect staining efficacy of SytoxGreen. Therefore, before and  
17 after confocal images of RIMS infusion were taken of islets that did not undergo lipid disruption.

### 18 ***On-chip Visualization in 3D***

19 After the desired staining, monomer gelation, or membrane disruption treatments were completed,  
20 microtissues were infused with RIMS at 800  $\mu\text{L/hr}$  (for tumour spheroids), or at 400  $\mu\text{L/hr}$  (for  
21 murine islets) for 10 – 15 minutes. Confocal images were then taken with a 20X objective lens

1 using a Zeiss LSM710 confocal microscope. Image stacks were then fed through the MATLAB  
2 script for analysis.

### 3 *Volume shrinkage and imaging depth quantification*

4 The spheroids that were used in volume shrinkage and imaging depth quantification did not  
5 undergo SDS lipid disruption. Spheroid images were quantified for their volume shrinkage and  
6 imaging depth by MATLAB (Supplementary code SC1 'Z\_stack\_area\_generation.m'). The code  
7 analyzes each slice of a z-stack of a spheroid, applies a slight blur and determines the area of the  
8 image where the spheroid exists. It lists the intensities of the pixels within the region that are above  
9 a threshold generated by a thresholding function and quantifies the amount of positive pixels  
10 within that region. For volume shrinkage quantification, this process repeats for each slice in the  
11 z-stack image sequence to find the image with the largest cross-sectional area. To collate the data,  
12 use Supplementary code SC2 'Collect\_Volume\_and\_Area\_data.m', which looks through the  
13 directory and extracts the relevant data into a master xlsx file. The largest cross-sectional area of  
14 spheroids before and after on-chip RIMS infusion were divided to determine the extent of volume  
15 shrinkage. Note that individual spheroids were compared to themselves, and that the shrinkage is  
16 not averaged across all the replicates. For quantifying imaging depth increase, the number of  
17 positive pixels of each image slice is divided by the total number of pixels within the same region.  
18 If this ratio is greater than 25%, it counts this slice as an acceptable image. Spheroids were imaged  
19 before and after the RIMS infusion, and the number of acceptable slices obtained after RIMS  
20 infusion is divided by the number of acceptable slices before, to generate the ratio seen in Figure  
21 S3(i). To prevent bias due to volume shrinkage, only MCF-7 spheroids that were treated with 4%  
22 and 8% acrylamide, along with U87MG/GFP spheroids treated with 8% acrylamide were used to  
23 calculate the increase in imaging depth. Spheroids that shrink after RIMS infusion would show

1 very little increase in imaging depth, since the shrinkage decreases the absolute number of slices  
2 that exist in the spheroid, and would mask any increase in imaging depth.

### 3 *Diffusion versus flow rate quantification*

4 To compare the effect of flow rate on interstitial media exchange, B16F10 spheroids were grown,  
5 loaded, and treated with 4% acrylamide as described. RIMS was infused into the device briefly  
6 before the fluidic flow was stopped by pausing the pump and clamping the tubing. The RIMS was  
7 allowed to diffuse into the spheroid for an hour, during which time fluorescent images were taken  
8 every 15 sec with 1.5 sec of exposure each time. To ensure that the spheroid had not reached  
9 maximum fluorescence after the allotted diffusion period, flow was restarted and media exchange  
10 was allowed to proceed (see Figure S4b for fluorescence intensity profile). We chose this method  
11 to measure diffusion-induced fluid exchange because if spheroids were loaded onto a device that  
12 already had RIMS within it, the fluid flow that the spheroids would experience on the way to the  
13 interrogation wells cannot be reproducibly controlled, and would induce interstitial fluid exchange  
14 before diffusion can be measured. In a separate device, spheroids were first infused with RIMS at  
15 200  $\mu\text{L/hr}$ . Fluorescent images of the spheroid were then taken as the interstitial RIMS was  
16 subsequently exchanged with PBS at 200  $\mu\text{L/hr}$ . Following this, RIMS was re-infused at 400  
17  $\mu\text{L/hr}$ , replaced by PBS at 400  $\mu\text{L/hr}$ , re-infused at 800  $\mu\text{L/hr}$ , and finally replaced by PBS at 800  
18  $\mu\text{L/hr}$ . The fluorescent intensities were quantified by MATLAB, which was written to calculate  
19 the average intensity of each image in the time sequence. The time-varying fluorescence intensities  
20 can be seen in Figure S4. Fluorescence intensity profiles for 200, 400, and 800  $\mu\text{L/hr}$  flow rates  
21 were fitted to an exponential decay model (Figure S4b and Supplementary Table 1), and the half-  
22 lives were inverted and graphed in Figure 4. For diffusion, the half-life was extrapolated by taking



1 the linear slope generated in the diffusion region of Figure S4a and determining the time that is  
2 required to increase fluorescence by 50% of the maximum intensity.

### 3 *Islet Vasculature Analysis and Quantification*

4 Islet Vasculature analysis and quantification was performed in MATLAB, using the DIP image  
5 toolbox v2.7, provided in Supplemental Code SC3 “connectivity\_analysis.m.” A threshold is  
6 first applied to the image stack to exclude any background signals. It is then converted into a  
7 binary format that detects whether a voxel (pixel in 3D) is fluorescent or not, then looks for  
8 neighbouring voxels positively fluorescent to determine the total number of voxels in one inter-  
9 connecting vessel network. Since each voxel is a known volume, the total volume of the vessel  
10 network can be determined. The code also determines the total islet volume after the convex hull  
11 function has been applied to the image stack. Dividing the volume of the three largest vessels by  
12 the total islet volume generates the values in Figure 6e. The islet core is determined by applying  
13 the distance transform function and finding the inner area that is defined when the computer has  
14 gone 50% of the maximum distance possible inwards. The proportion of the largest 3 vessels that  
15 are within this inner area is determined to give the values found in Figure 6f. Dividing the total  
16 volume of the three largest vessels by the total vasculature volume (not the total islet volume)  
17 yields the connectivity values in Figure 6g.

1 *Supplementary Figures*

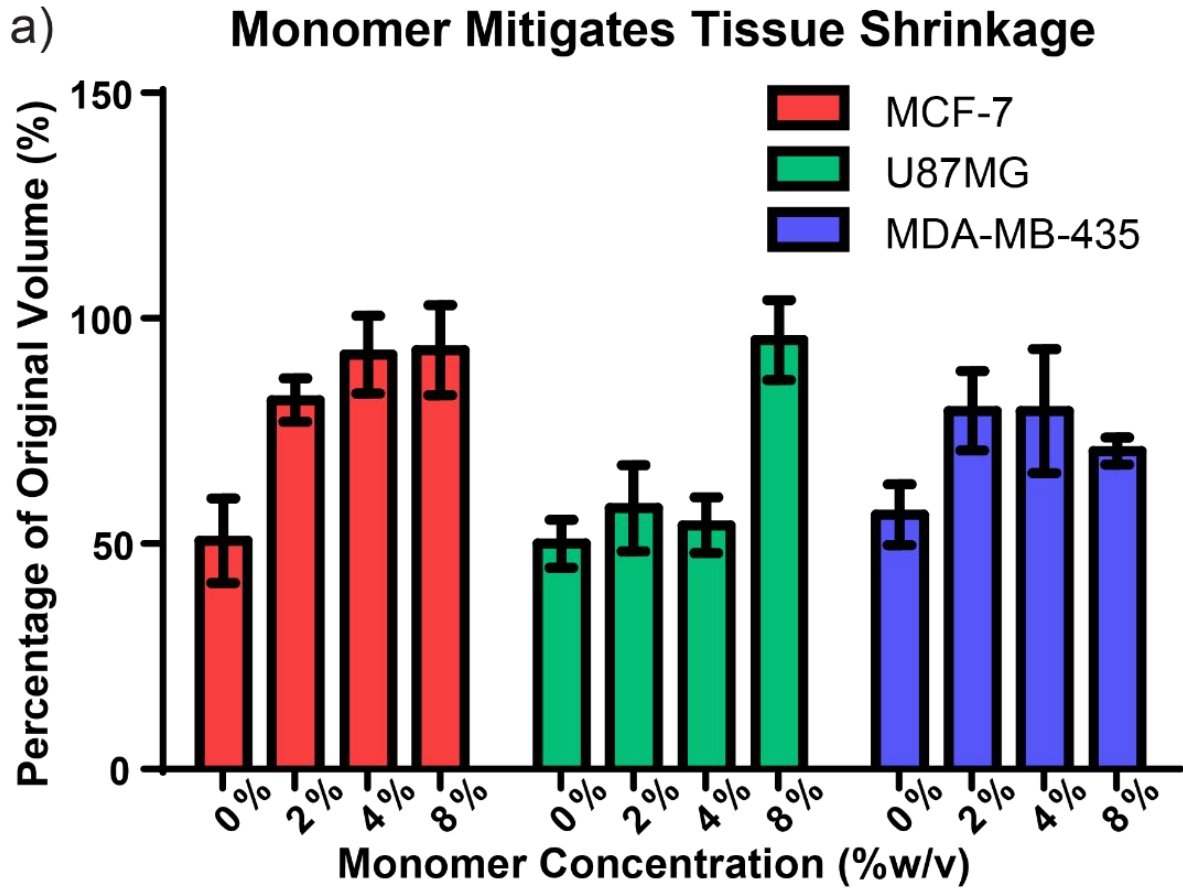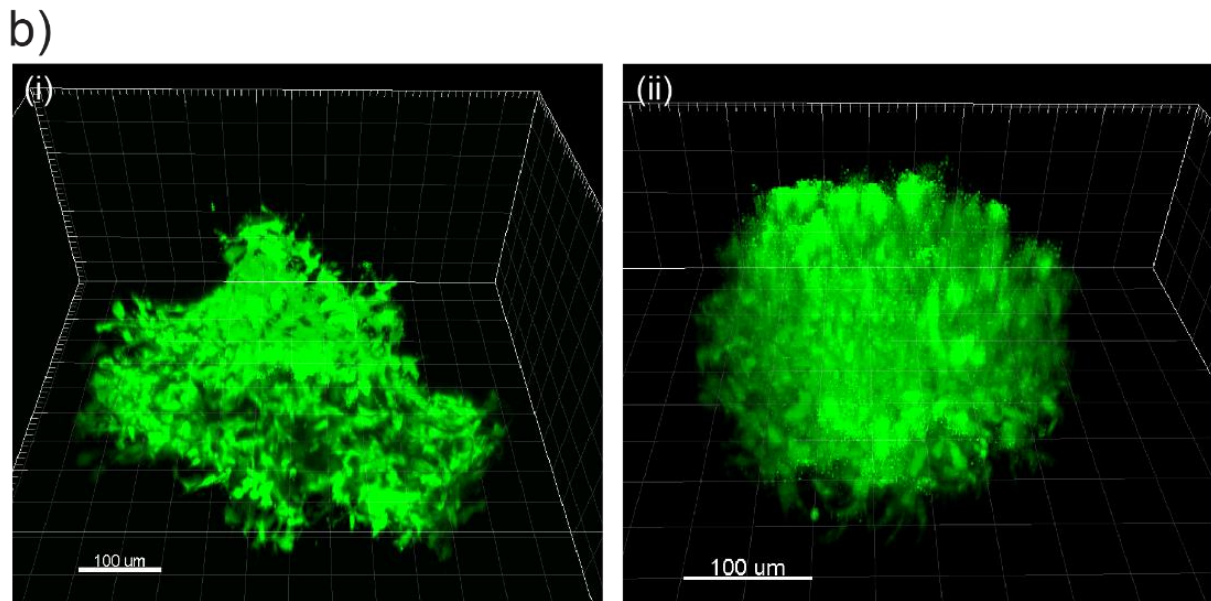

2

1 **Figure S1: *Tissue Preservation depends on Monomer Concentration.*** a) The optimal acrylamide  
2 monomer concentration to prevent tissue shrinkage varies with tissue type and the cell line of  
3 origin. b) Tissues will be distorted by fluidic forces upon RIMS infusion if acrylamide is omitted.  
4 i) U87MG/GFP spheroid fixed with 4% formaldehyde with no acrylamide, ii) U87MG/GFP  
5 spheroid treated with 4% formaldehyde and 8% acrylamide. Green – green fluorescent protein, ex.  
6 488 nm, em. 493-598 nm. Scale bar is 100  $\mu\text{m}$ .

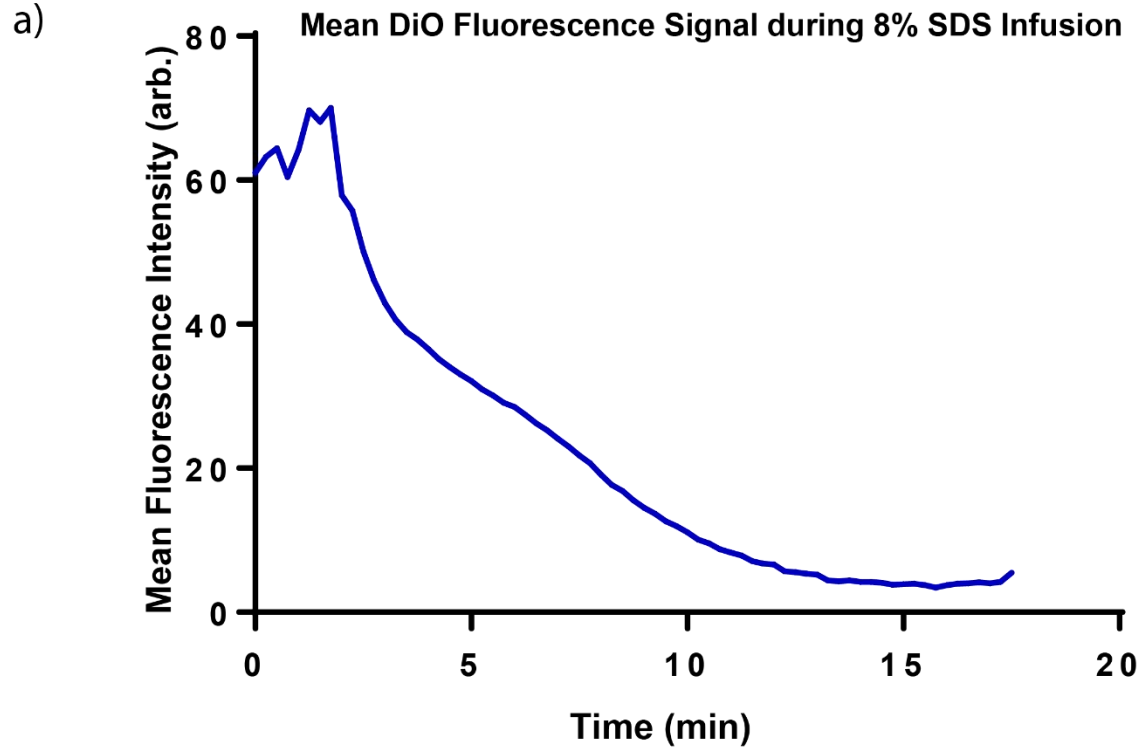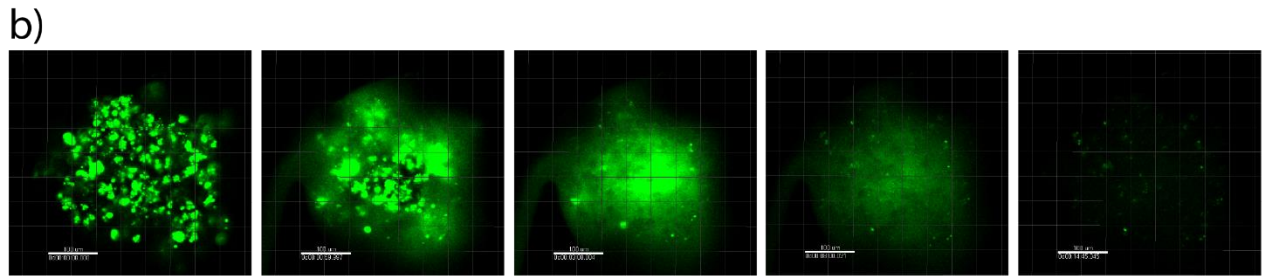

1  
 2 **Figure S2: Membrane Disruption Completes in Minutes.** Membranes of MDA-MB-231 cells are  
 3 stained with DiO prior to spheroid generation. DiO fluorescence signal (shown in green, ex. 458  
 4 nm, em. 481-538 nm) decreases as the lipid bilayer membrane is washed away under 8% SDS  
 5 infusion at 800  $\mu$ L/hr. Membrane disruption is completed at approximately 3-5 minutes, and lipid  
 6 clearance is completed in 12-15 minutes. Scale bar is 100  $\mu$ m.

7

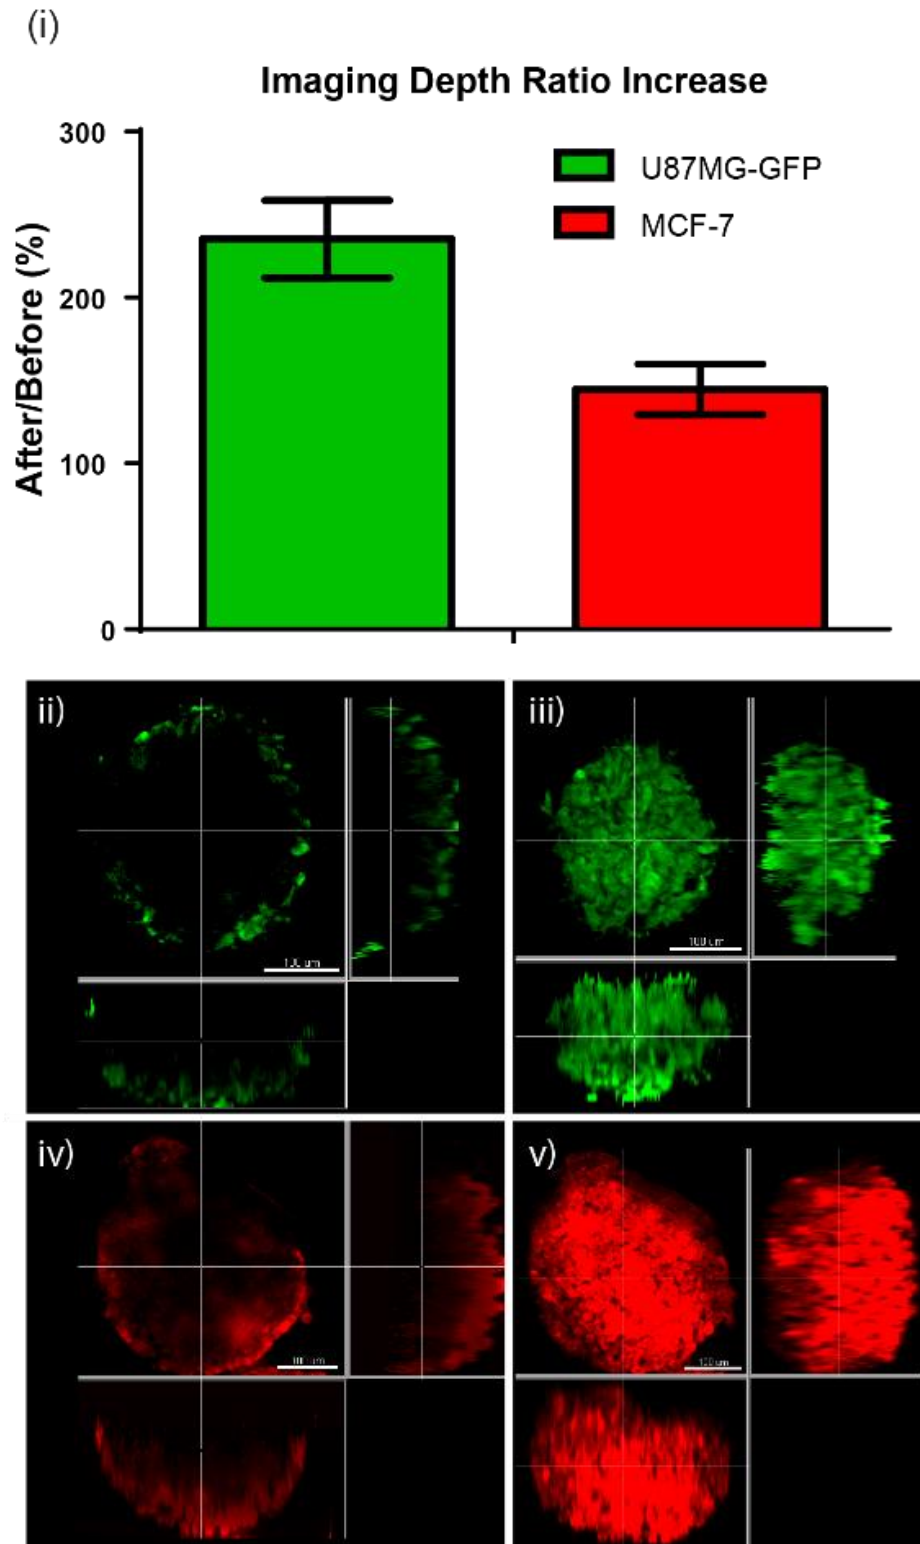

1  
 2 **Figure S3: Imaging Depth is Dramatically Increased after on-chip Clearing.** (i) Imaging Depth  
 3 increase, calculated by dividing the number of acceptable image slices after treatment with that of

1 before treatment. An acceptable image slice must have at least positive pixels in 25% of the  
2 spheroid area. (ii) Cross section images of U87MG-GFP spheroids before and (iii) after clarifying  
3 treatment (green – GFP ex. 488nm, em. 493-598 nm). (iv) Cross section images of MCF7  
4 spheroids, stained with CellTracker Red (ex. 543nm, em. 567-739nm) before and (v) after  
5 clarifying treatment. Scale bars are 100  $\mu$ m.

### a) Diffusion Dependent Fluorescence Increase

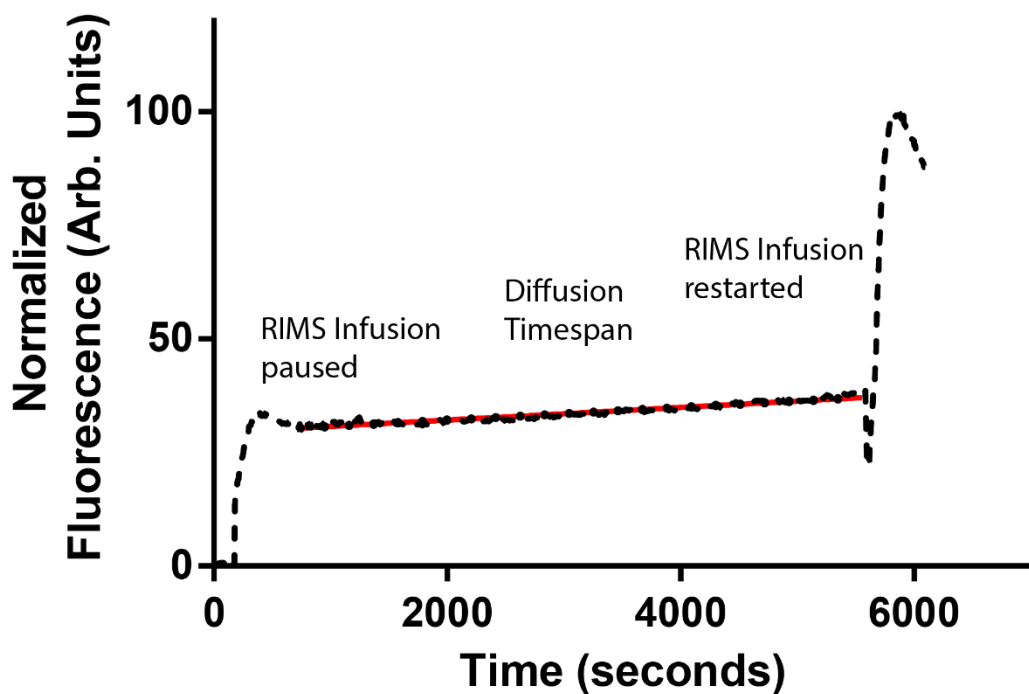

### b) Fluorescence Decreases with PBS Exchange

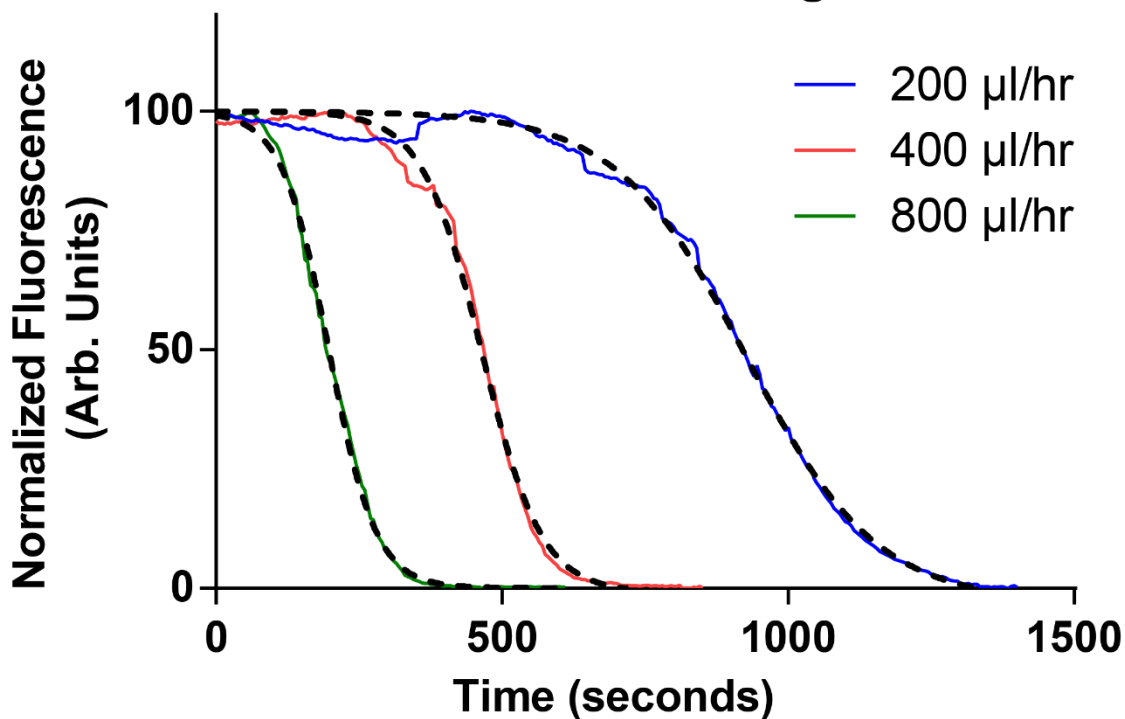

1 **Figure S4: *Interstitial Fluid Exchange under Induced Flow or Diffusion.*** a) Diffusion-driven  
2 fluid exchange was characterized by infusing RIMS onto the device briefly before the flow was  
3 interrupted. RIMS was allowed to diffuse into B16F10 spheroids while fluorescent images were  
4 collected. Flow was restarted to ensure that maximum fluorescence intensity, and therefore  
5 complete media exchange, has not yet occurred. Fluorescence intensity (ex. 543 nm, em. 565-702  
6 nm) was quantified using MATLAB as described in Supporting Information. b) RIMS within  
7 B16F10 spheroids were exchanged with PBS under different flow rates, leading to a decrease of  
8 fluorescence that is measured through imaged time series (5 sec scan interval, ~1 sec scan time).



1

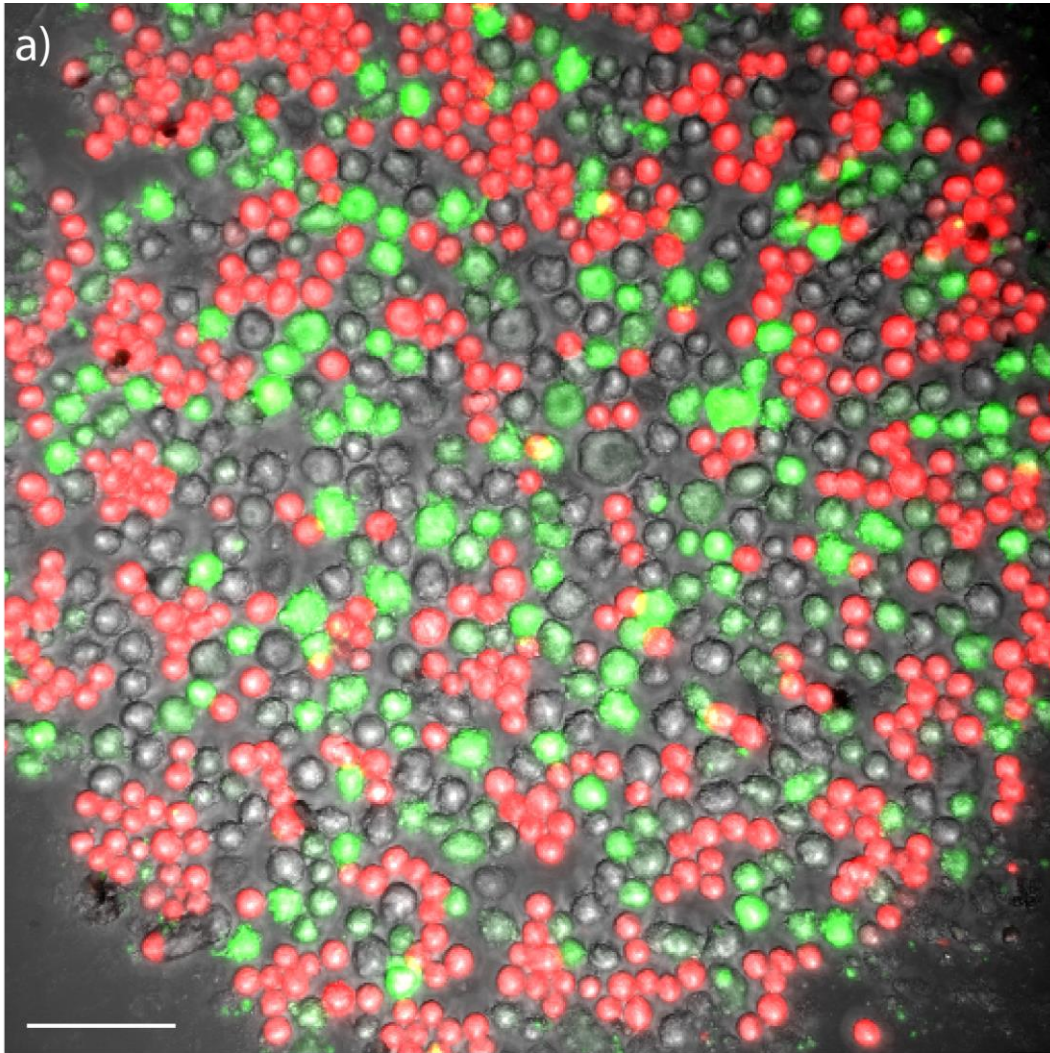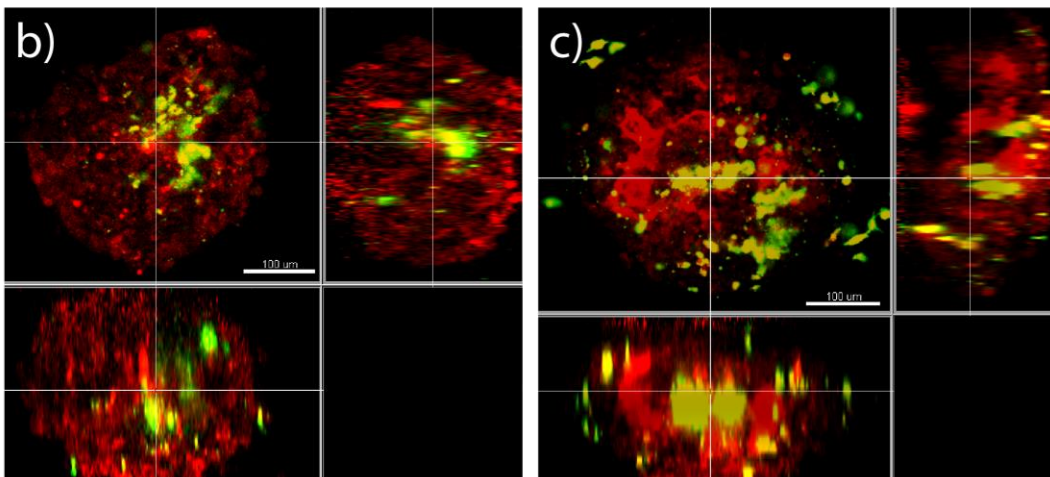

2

1 **Figure S5: HUVEC Migration to Spheroid Core varies with Cancer Cell Type.** a) Cell pellet of  
2 a mixture of B16F10/HUVEC hybrid spheroids (Red - B16F10-tdtomato ex. 543 nm, em. 565-  
3 685 nm, green – HUVEC-GFP ex. 488 nm, em. 493-536 nm). Cells were initially  
4 homogeneously mixed and centrifuged to form a cell pellet, which forms a spheroid and was  
5 imaged in Figure 5a on day 3 of incubation and found to have a core of HUVECs. b) Spheroid  
6 composed of MDA-MB-231 breast cancer cells (red – tdTomato ex. 543 nm, em. 564-744 nm)  
7 mixed with HUVECs (green – GFP ex. 488 nm, em. 493-536 nm) form a core-shell structure,  
8 whereas in c), MDA-MB-435 metastatic melanoma cells (red – CellTracker Red ex. 543 nm, em.  
9 565-685 nm) mixed with HUVECs (green – GFP ex. 488 nm, em. 493-536 nm ) has the  
10 HUVECs congregating along the periphery as well as some parts of the interior. Scale bar is 100  
11  $\mu\text{m}$ .

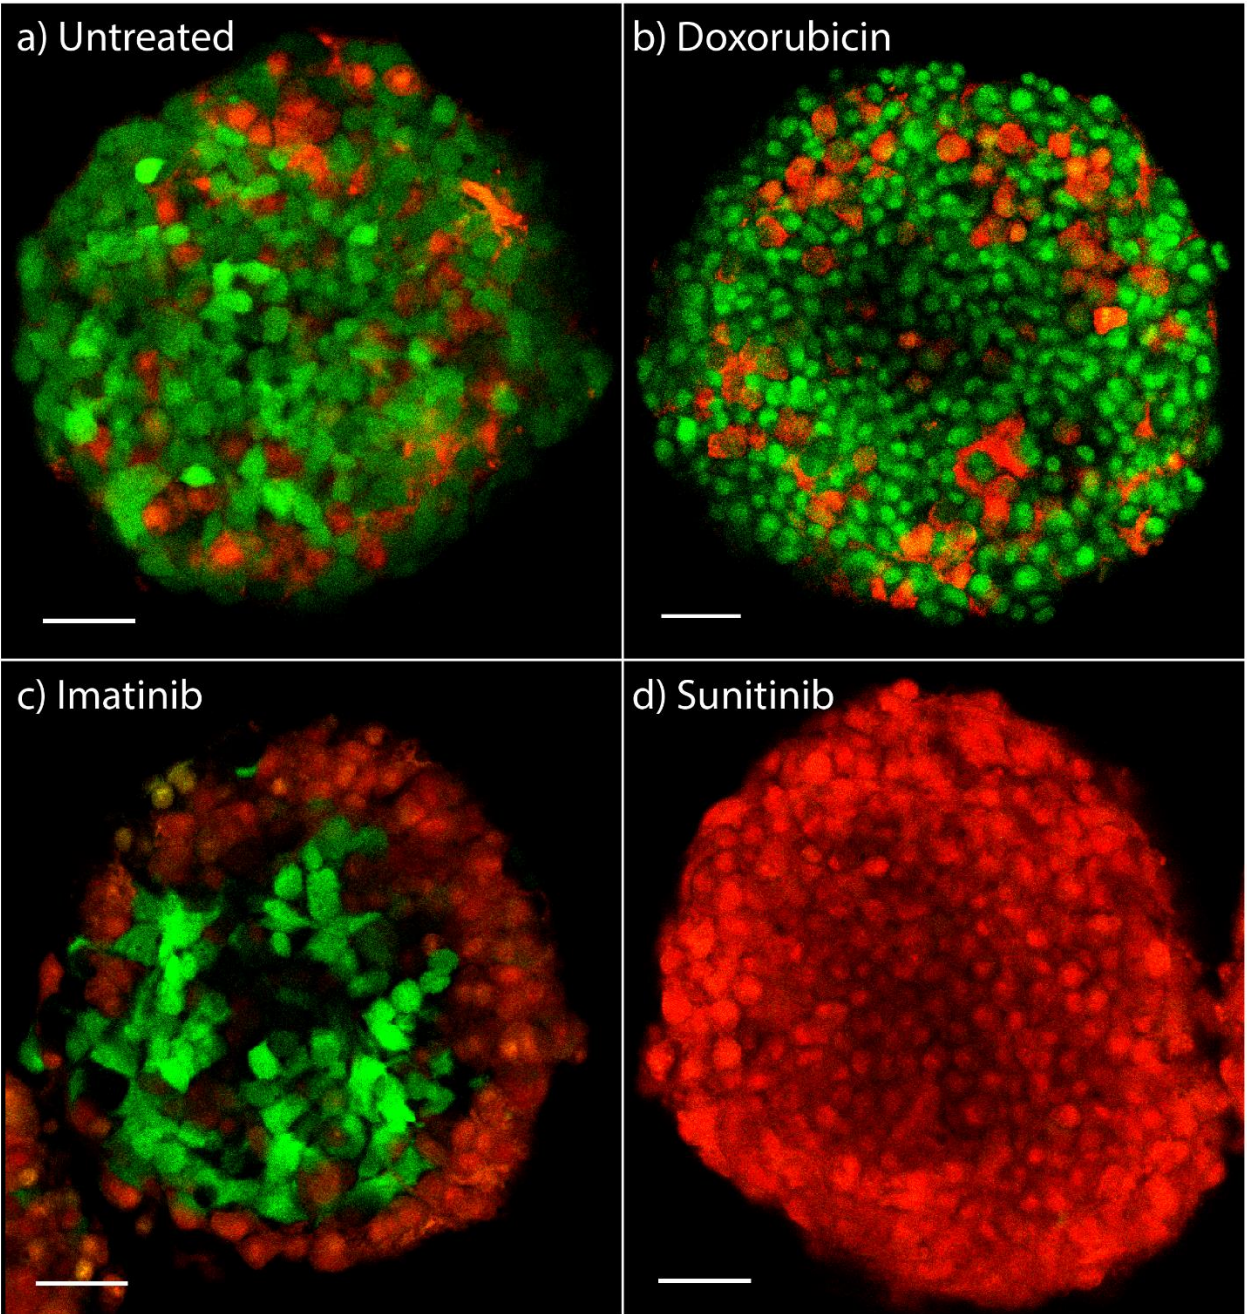

1

2 **Figure S6: Proof-of-Concept Drug Screening Trial.** Spheroids composed of B16F10 cancer  
3 cells were a) untreated, or treated for 3 hours in static, complete media with b) doxorubicin (180  
4  $\mu\text{M}$ ), or with c) imatinib (180  $\mu\text{M}$ ), or with d) sunitinib (180  $\mu\text{M}$ ), before being extracted from  
5 static culture and placed on a microfluidic chip. Spheroids were infused with a fixable Near-IR  
6 live/dead stain, and dead cells are shown here in red, with live cells shown in green. (Green -

1 B16F10-tdtomato ex. 543 nm, em. 565-685 nm, red- Near-IR live/dead stain ex. 633 nm, em.  
2 667-753 nm). Images show that anti-cancer activity is highest for sunitinib (complete spheroid  
3 death), followed by imatinib (only peripheral death), and followed by doxorubicin  
4 (indistinguishable from untreated spheroid control). Scale bar is 50  $\mu\text{m}$ .

1 **Supplementary Table 1: Variable-slope Sigmoidal fitting characteristics from Figure S4b**

|                                 | 200ul/hr               | 400ul/hr               | 800ul/hr               |
|---------------------------------|------------------------|------------------------|------------------------|
| <b>Best-fit values</b>          |                        |                        |                        |
| Bottom                          | 140.7                  | 147.7                  | 163                    |
| Top                             | 2140                   | 2106                   | 2471                   |
| LogEC50                         | 619.9                  | 277.8                  | 141.7                  |
| HillSlope                       | -0.004115              | -0.008516              | -0.009063              |
| EC50                            |                        |                        |                        |
| <b>Std. Error</b>               |                        |                        |                        |
| Bottom                          | 6.689                  | 6.766                  | 4.1                    |
| Top                             | 4.714                  | 9.491                  | 16.13                  |
| LogEC50                         | 1.387                  | 1.16                   | 1.002                  |
| HillSlope                       | 0.00005101             | 0.0001749              | 0.0001428              |
| <b>95% Confidence Intervals</b> |                        |                        |                        |
| Bottom                          | 127.5 to 153.8         | 134.4 to 160.9         | 154.8 to 171.1         |
| Top                             | 2131 to 2149           | 2088 to 2125           | 2439 to 2503           |
| LogEC50                         | 617.2 to 622.6         | 275.6 to 280.1         | 139.7 to 143.7         |
| HillSlope                       | -0.004215 to -0.004015 | -0.008859 to -0.008173 | -0.009346 to -0.008779 |
| EC50                            |                        | +infinity to +infinity | +infinity to +infinity |
| <b>Goodness of Fit</b>          |                        |                        |                        |
| Degrees of Freedom              | 215                    | 129                    | 110                    |
| R square                        | 0.9984                 | 0.9974                 | 0.9987                 |
| Absolute Sum of Squares         | 212220                 | 224162                 | 84338                  |
| Sy.x                            | 31.42                  | 41.69                  | 27.69                  |
|                                 |                        |                        |                        |
| <b>Number of points</b>         |                        |                        |                        |
| Analyzed                        | 219                    | 133                    | 114                    |

2

3

1 *Supplementary Code*

2 *SC1: “Z\_stack\_area\_generation.m”*

3 This MATLAB code analyzes the confocal image stack, and generates a .csv file with the  
4 fluorescence intensities. If you have multiple confocal image stack files within your folder, it will  
5 go through each image stack file in sequence and analyze them all.

6 CODE BEGINS

```
7 %Z_stack_area_generation: Analyzes Spheroid Z-stack Images
8 %
9 % This script requires:
10 %
11 % 1) folder with raw lsm files from confocal of microtissues (e.g.
12 % spheroids)
13 % 2) BioFormats for MATLAB
14 % (https://www.openmicroscopy.org/site/support/bio-formats5.1/users/matlab/)
15 %
16 %
17 % It outputs:
18 % 1)Mean fluorescence intensity of the spheroid when it is re-indexed as a
19 % series of concentric rings (intensity of each ring of that slice)
20 % 2)Total apparent volume
21 % 3)Maximum cross-sectional area
22 % 4)The number of 'imageable' slices
23 % 5)The mean aspect ratio (although not used for analysis in the paper)
24 % 6)Mean intensity of each shell, if the spheroid was re-indexed in 3D as a
25 % series of concentric shells.
26
27 clc
```

```

1  close all
2  clear all
3  matlab_folder = pwd;%remembers the current folder so it can come back to it
4
5  data_folder = uigetdir('Select folder with image files');
6  cd(data_folder);
7  h = fspecial('disk', 20);
8  bins = 1:5:250;
9
10 files = dir('*.lsm'); %Creates a matrix consisting of the LSM files in your chosen folder
11 for lsmnum = 1:size(files,1)
12     clear currimg mean_values total mean_positive avg
13     stack = b fopen(files(lsmnum).name); %opens up the LSM files (one per for loop iteration)
14     slicenum = size(stack{1,1},1);
15
16     for p = 1:slicenum
17         currimg(:, :, p) = stack{1,1}{p,1};
18     end
19
20     img2 = double(currimg(:, :, 1:3:end)); %Extracts the channel that you want to analyze ('1' =>
21 Analyze Channel 1; '3' => Total number of channels in the z stack)
22     rebuilt = zeros(size(img2)); %Pre-generating a matrix
23
24     %Defines the region of the whole spheroid and pre-generates some
25     %matrices
26     blur_img = imfilter(img2,h);
27     thresh_blur = multithresh(blur_img,3);
28     mean_whole_img = mean(mean(mean(blur_img)));
29     x = zeros(size(blur_img));
30     positive_signal = zeros(size(blur_img,3),1);

```

```

1  total_area_per_slice = zeros(size(blur_img,3),1);
2  aspect_ratio = zeros(size(blur_img,3),1)';
3
4
5  for z = 1:size(blur_img,3) %Slice-by-slice Analysis
6      tempimg = img2(:,:,z);
7      temprebuilt = rebuilt(:,:,z);
8      threshold_spheroid = (thresh_blur/mean_whole_img)*mean(mean(tempimg));%normalize
9  the threshold for the slice
10     %Image format changing (adjusts threshold based on 8 or 16-bit
11     %image
12     if isa(currimg, 'uint16')
13         divide_by_this_number = 65535;
14         if threshold_spheroid(1)>765
15
16         else
17             threshold_spheroid(1) = 765;
18         end
19     elseif isa(currimg, 'uint8')
20         divide_by_this_number = 255;
21         if threshold_spheroid(1)>2
22
23         else
24             threshold_spheroid(1) = 2;
25         end
26     end
27
28     bright_pixel = blur_img(:,:,z)>threshold_spheroid(1);
29     spheroid = bwconvhull(bright_pixel);
30     distancemap = bwdist(~spheroid);

```



```

1     x(:,:,z) = spheroid;%designates x as the 3D matrix that describes the entire spheroid
2
3     %Finds the aspect ratio of each image slice. Not used in the final
4     %analysis, was originally conceived as a way of quantifying tissue
5     %deformity.
6     stats = regionprops(spheroid, 'MajorAxisLength', 'MinorAxisLength');
7     if isempty(stats) == 1 %Some image stacks are blank. This line prevents them from messing
8 up the data.
9         aspect_ratio(z) = 0;
10    else
11        aspect_ratio(z) = stats.MajorAxisLength/stats.MinorAxisLength;
12    end
13
14    positive_signal(z) = sum(sum(tempimg>threshold_spheroid(1)));
15    total_area_per_slice(z) = sum(sum(x(:,:,z))); %Determines the number of pixels within the
16 spheroid, whether fluorescent or not.
17
18    %Takes each image z-slice and re-indexes them as a series of
19    %concentric rings. Width of rings depends on 'bins' variable from
20    %line 9.
21    for l = 1:(length(bins)-1)
22
23        outside = distancemap<bins(l);
24        inside = distancemap>bins(l+1);
25
26        ring = ones(size(distancemap))-outside - inside;
27        ring = ring>0;
28
29
30    values = tempimg(ring);

```

```

1
2     positivevalues = values(values>threshold_spheroid(1));
3     if isempty(positivevalues)
4         positivevalues = 0;
5     end
6
7     mean_values(l,z) = mean(values);
8     total(l,z) = sum(values);
9
10    if sum(sum(ring))>0.5
11        mean_positive(l,z) = mean(positivevalues)+0.0001;
12    else
13        mean_positive(l,z) = mean(positivevalues);
14    end
15
16    temprebuilt(ring) = mean_positive(l,z);
17
18    end
19    %end of Rings
20
21    rebuilt(:,z) = temprebuilt;
22 end
23
24 cd(matlab_folder);
25 [meanshell,~,~,~] = rings_3D(mean_positive);
26 cd(data_folder);
27
28 %This section of the code generates data and other outputs
29 volume = sum(sum(sum(x)));
30

```

```

1   for H = 1:size(mean_positive,2)
2       avg(H) = mean(nonzeros(mean_positive(:,H)));% mean fluorescence intensity
3   end
4
5   appended_data = [mean_positive; avg];
6   T = table(appended_data);
7   sumslices = sum(sum(x));%determines area of the spheroid (remember x is the spheroid)
8   max_area = sumslices(sumslices==max(sumslices)); %finds the maximum area in a given
9   STACK of images. This value is used to compare for volume shrinkage (divide this value in the
10  'before' image stack with the one obtained from the 'after' image stack
11  positive_pixels_percentage = positive_signal./total_area_per_slice; %Determines the
12  percentage of positive pixels for 'imageability' determination
13
14  truncate_ppp =
15  (total_area_per_slice>(max_area(1)*0.1)).*(positive_pixels_percentage);%discounts small area
16  slices
17  thresh_positive_pixels = 0.25; %The value 0.25 means that to be considered an image slice that
18  is 'imageable', 25% of the total number of pixels within the spheroid must be positively fluorescent.
19  num_positive_pixels_percentage = sum(truncate_ppp>thresh_positive_pixels);%counts
20  number of acceptable slices
21
22
23  %counts the number of rings in non-zero image slices
24  num_rings = sum(mean_positive>0);
25  num_rings_nonzero = num_rings(num_rings>0);
26  num_rings_processed = num_rings_nonzero';
27  %   R = table(num_rings_processed, positive_signal./total_area_per_slice);
28
29
30  qualify_aspect_ratio = (truncate_ppp>thresh_positive_pixels).*(aspect_ratio);%get rid of 0
31  aspect ratio values
32
33  aspect_output = table(aspect_ratio', truncate_ppp, qualify_aspect_ratio);

```

```

1  mean_aspect_ratio = mean(qualify_aspect_ratio(qualify_aspect_ratio>0));
2  V = table(volume,max_area(1),num_positive_pixels_percentage,mean_aspect_ratio);
3
4
5  IDShell = table(meanshell);
6
7  currfile = files(lsmnum).name;
8  foldername = currfile(1:(end-4));
9
10 mkdir(foldername);%makes a folder of the same name as the analyzed file
11 cd(foldername);
12
13
14 %Generates a file with the mean fluorescence intensity (each column is
15 %an image slice, and each entry of the column is the mean fluorescence
16 %intensity of that ring, starting from the outer-most ring of the
17 %image slice)
18 filepositive = strcat(currfile(1:(end-4)),'_mean_positive.csv');
19 writetable(T,filepositive);
20
21 %Generates a file with the total volume of the spheroid, the maximum
22 %cross-sectional area, the number of 'imageable' slices, and the mean
23 %aspect ratio
24 filevolume = strcat(currfile(1:(end-4)),'_volume.csv');
25 writetable(V,filevolume);
26
27 %Generates a file with the aspect ratio of each slice
28 fileaspect = strcat(currfile(1:(end-4)),'_aspect_ratio.csv');
29 writetable(aspect_output,fileaspect);
30

```

```

1   %Generates a file that lists the shells and their mean fluorescence
2   %intensity, starting from the outermost shell
3   file_meanshell = strcat(currfile(1:(end-4)),'_meanshell.csv');
4   writetable(IDShell, file_meanshell);
5
6   for j = 1:size(blur_img,3)
7       filerebuilt = strcat(currfile(1:(end-4)),'_rebuilt_',num2str(j),'.tif');
8       imwrite(rebuilt(:,:,j)/divide_by_this_number,filerebuilt);
9   end
10
11
12   %end of outputs
13   cd(data_folder);
14
15 end
16 cd(matlab_folder);
17 CODE ENDS
18 SC2: "Collect_Volume_and_Data.m"

```

19 This MATLAB code will go through your folder and retrieve all of the values from the previously  
20 generated .csv files. This was used to organize spheroids subjected to the same conditions into a  
21 table for ease of comparisons between replicates and against varying conditions.

```

22 CODE BEGINS
23 clc
24 close all
25 clear all
26 matlab_folder = pwd;%remembers the current folder so it can come back to it
27

```

```

1  experiment_folder = uigetdir('','Select top level folder with excel files');
2  cd(experiment_folder);
3  previous_data = {'Filename' 'Volume' 'Max Area' 'Imaging Depth' 'Average Aspect Ratio'};
4  subfolder_list = dir('*z stack*')
5  tmp = [subfolder_list.isdir];
6  for i = 1:length(tmp)
7      cd(experiment_folder);
8      if tmp(i) ==1
9          lvl1dir = subfolder_list(i).name;
10         cd(lvl1dir);
11         recall_to_lvl1 = pwd;
12         locate_excel_file = dir('*volume.csv');%finds files with 'volume.csv'
13         filename = locate_excel_file.name; %finds the csv file
14         find_excel_data = csvread(filename, 1, 0); %opens the csv file and grabs the numbers
15         name_with_data = {filename, find_excel_data(1), find_excel_data(2), find_excel_data(3),
16         find_excel_data(4)}; %generates a set with filename and data
17         appended_data = [previous_data; name_with_data]; %adds the name and numbers to the
18         previous data
19         previous_data = appended_data;
20     end
21 end
22
23
24
25 subfolder_list2 = dir('*gelation*')%finds the folder with 'gelation' in its name
26 tmp = [subfolder_list2.isdir];
27
28 for k = 1:length(tmp)
29     cd(experiment_folder);
30     if tmp(k) ==1

```

```

1     lvl1dir = subfolder_list2(k).name;
2     cd(lvl1dir);
3     recall_to_lvl1 = pwd;
4     sub_subfolder_list = dir('*z stack*');
5     tmp2 = [sub_subfolder_list.isdir];
6     for j = 1:length(tmp2)
7         cd(recall_to_lvl1);
8         if tmp2(j) == 1
9             lvl2dir = sub_subfolder_list(j).name;
10            cd(lvl2dir);
11            recall_to_lvl2 = pwd;
12            locate_excel_file = dir('*volume.csv');
13            %     find_excel_data = readtable(locate_excel_file.name)
14            filename = locate_excel_file.name; %finds the csv file
15            find_excel_data = csvread(filename, 1, 0); %opens the csv file and grabs the numbers
16            name_with_data = {filename, find_excel_data(1), find_excel_data(2),
17            find_excel_data(3), find_excel_data(4)}; %generates a set with filename and data
18            appended_data = [previous_data; name_with_data]; %adds the name and numbers to the
19            previous data
20            previous_data = appended_data;
21        end
22    end
23 end
24 end
25 cd(experiment_folder);
26 collated_filename = strcat(experiment_folder(66:end-4),'_Collated Data.xlsx');
27 tabulate = table(appended_data);
28 writetable(tabulate, collated_filename);
29
30 CODE ENDS

```

1  
2  
3  
4  
5  
6  
7  
8  
9  
10  
11  
12  
13  
14  
15  
16  
17  
18  
19  
20  
21  
22  
23  
24  
25  
26  
27

**SC3: “connectivity\_analysis.m”**

This MATLAB code analyzes your vasculature channel, applies a local threshold to determine whether a pixel is positive for signal, then looks at its neighbours to construct the vasculature networks, labels it, then measures volume, size, and mean fluorescence intensity from the original image in the regions defined by the labels.

CODE BEGINS:

```
% CONNECTIVITY_ANALYSIS Analyses the blood vessel network from mouse islets  
%  
% This script requires:  
%  
% 1) folder with raw lsm files from confocal of mouse islets.  
% 2) dipimage toolbox: http://www.diplib.org/dipimage.  
%  
%  
% It outputs:  
% 1) label matrix of blood vessel segments (each segment labelled with a  
% unique integer). 'filename.lsm' becomes 'filename.tif'  
%  
% 2) Outputs of analysis saved as 'filename_connectivity_results.csv' with  
% various statistics describing vessel network.
```

```
clc  
close all  
clear all
```



```

1  matlab_folder = pwd;%remembers the current folder so it can come back to it
2
3  data_folder = uigetdir('Select folder with image files');
4  cd(data_folder);
5
6
7  files = dir('*.ism');
8      %%% Uncomment this line to run in multithread
9  % parfor(lsmnum = 1:size(files,1),16)
10     %%% Uncomment this line to run in single thread
11  for lsmnum = 1:size(files,1)
12
13     oldname = files(lsmnum).name;
14     filepositive = strcat(oldname(1:(end-4)),'_connectivity_results.csv');
15
16     if exist(filepositive)==0 % only runs if there isn't already a results file
17
18         %%% Read file and metadata
19         stack = b fopen(files(lsmnum).name);
20         slicenum = size(stack{1,1},1);
21
22         omeMeta = stack{1, 4};
23         stackSizeX = omeMeta.getPixelsSizeX(0).getValue(); % image width, pixels
24         stackSizeY = omeMeta.getPixelsSizeY(0).getValue(); % image height, pixels
25         stackSizeZ = omeMeta.getPixelsSizeZ(0).getValue(); % number of Z slices
26         numchannels = size(stack{1,1},1)/stackSizeZ;
27
28         metadata = stack{1, 2};
29         physSizeX = metadata.get('VoxelSizeX');
30         physSizeY = metadata.get('VoxelSizeY');

```

```

1     physSizeZ = 1.45*metadata.get('VoxelSizeZ');
2     %Note: physSizeZ is multiplied by 1.45 to account for the
3     %refractive index of RIMS compared to air. Images are taken with an
4     %air objective which artificially reduces the observed z-thickness.
5
6
7     %%% Specifies size of filter for local threshold
8     h = fspecial('disk', round(stackSizeX/10));
9
10
11    %%% Specifies which channel was used to image vasculature for
12    %%% multichannel images.
13    if oldname(1:3)=='Aug'
14        ves_ch = 1;
15    elseif numchannels==1
16        ves_ch = 1;
17    else
18        ves_ch = 2;
19    end
20
21
22    %%% Preprocessing of image
23    currimg= zeros([size(stack{1,1}{1,1}),stackSizeZ]);
24    for p = 1:slicenum
25        currimg(:, :,p)= stack{1,1}{p,1};
26    end
27
28    %%% Extract vessel channel from the loaded image
29    img = double(currimg(:, :,ves_ch:numchannels:end));
30

```

```

1      %%% Blurred vessel image used to determine local threshold
2      blur_img = imfilter(img,h);
3
4
5      %%% Create a contrast normalized image for local thresholding
6      cont_norm = zeros([size(stack{1,1}{1,1}),stackSizeZ]);
7      for i = 1:size(img,3)
8          cont_norm(:,:,i) = img(:,:,i)./(blur_img(:,:,i) + 0.2*(max(img(:))));
9      end
10
11
12     %%% Threshold the contrast normalized image and cleanup
13     [~,thresh_blur] = threshold(cont_norm,'triangle');
14     thresholded_image = cont_norm>thresh_blur;
15     str_disk = strel('disk',7);
16     closed_image = imclose(thresholded_image,str_disk);
17
18
19     %%% Each connected region of blood vessels is assigned a label and
20     %%% size, mean signal and surface area of these networks are
21     %%% extracted
22     labeled_image = label(closed_image, 2, 10,0);
23     connectivity_stats = measure(labeled_image, img, ({'size' 'mean' 'SurfaceArea'}), [], 2,
24     10,0);
25
26
27     %%% Define the entire region of the islet and calculate the
28     %%% distance transform inwards to the islet centre
29     islet_outline = hull(opening(mat2im(img>0)),0);
30     islet = fillholes(dilation(islet_outline,3));

```

```

1  islet_padded = cat(3,islet(:,:,1)>10,islet, islet(:,:,1)>10);
2  islet_padded = erosion(islet_padded,4);
3  distancemap_padded = dip_edt(islet_padded, [physSizeX physSizeY physSizeZ], 1, 'fast');
4  distancemap = distancemap_padded(:,:,1:(end-1));
5  minimumradius = max(distancemap);
6
7  %%% Trims away vessel networks so that only vessels in the core of
8  %%% the islet are retained
9  trimmed_label_image = labeled_image;
10 trimmed_label_image(distancemap<(0.5*minimumradius))=0;
11
12
13 %%% Region recognized as the core of the islet.
14 trimmed_islet = islet;
15 trimmed_islet(distancemap<(0.5*minimumradius))=0;
16
17 %%% Collect size, mean signal and surface area of the trimmed
18 %%% vessel networks (trimmed meaning only within the core of the
19 %%% islet)
20 connectivity_stats_trimmed = measure(trimmed_label_image, img,({'size' 'mean'
21 'SurfaceArea'}), [], 2, 10,0);
22
23 %%% Calculates the average distance between any given pixel within
24 %%% the spheroid and the nearest blood vessel
25 vesseldist = dip_edt(~thresholded_image, [physSizeX physSizeY physSizeZ], 1, 'fast');
26 meandist2vessel = mean(vesseldist(islet & ~thresholded_image));
27
28 %%% Debugging code prevents errors in cases where no vessel
29 %%% networks are detected
30 if size(connectivity_stats,1)==0

```

```

1      M = zeros(1,3);
2      N = zeros(1,3);
3      Intensity_whole = zeros(1,3);
4      Surface_whole = zeros(1,3);
5  else
6      M = connectivity_stats.size;
7      N = connectivity_stats.ID;
8      Intensity_whole = connectivity_stats.mean;
9      Surface_whole = connectivity_stats.SurfaceArea;
10 end
11
12 if size(connectivity_stats_trimmed,1)==0
13     P = zeros(1,3);
14     Q = zeros(1,3);
15     Intensity_CORE = zeros(1,3);
16     Surface_core = zeros(1,3);
17 else
18
19     P = connectivity_stats_trimmed.size;
20     Q = connectivity_stats_trimmed.ID;
21     Intensity_CORE = connectivity_stats_trimmed.mean;
22     Surface_core = connectivity_stats_trimmed.SurfaceArea;
23 end
24
25 %%% Processing of statistics for export
26
27 unsorted_results_matrix = [N;M;Intensity_whole]';
28 sorted_matrix = sortrows(unsorted_results_matrix, -2);
29 unsorted_trim = [P;Q;Intensity_CORE]';
30 ID_max = sorted_matrix(1,1);

```

```

1  ID_top3 = sorted_matrix(1:3,1);
2  volume_member = ismember(unsorted_trim(:,2), ID_top3);
3  volume_member_max = ismember(unsorted_trim(:,2), ID_max);
4  mean_member = ismember(unsorted_trim(:,2), ID_top3);
5  mean_member_max = ismember(unsorted_trim(:,2), ID_max);
6  sum_trimmed_top3 = sum(unsorted_trim(volume_member, 1));
7  trimmed_max = (unsorted_trim(volume_member_max, 1));
8
9  if isempty(trimmed_max)
10     trimmed_max = 0;
11 end
12
13 if isempty(sum_trimmed_top3)
14     sum_trimmed_top3 = 0;
15 end
16
17 Intensity_top3 = mean(unsorted_trim(mean_member, 3))+0;
18 Intensity_max = mean(unsorted_trim(mean_member_max, 3))+0;
19
20 if isempty(Intensity_top3)
21     Intensity_top3 = 0;
22 end
23 if isempty(Intensity_max)
24     Intensity_max = 0;
25 end
26 sortedM = sort(M, 'descend');
27 sorted_surfaceareas = sort(Surface_whole, 'descend');
28 sorted_surfaceareas_core = sort(Surface_core, 'descend');
29 sorted_surfaceareas_core = padarray(sorted_surfaceareas_core,[0 3], 'post');
30

```

```

1
2     %%% Final output statistics
3     % This contains individual stats about vascular connectivity
4     O = zeros(size(N));
5
6     % Proportion of vessels in main network
7     O(1) = max(M)/sum(M);
8
9     % Proportion of vessels in top 3 networks
10    O(2) = sum(sortedM(1:3))/sum(M);
11
12    % Proportion of vessels in spheroid core that are in main network
13    O(3) = trimmed_max/sum(P);
14
15    % Proportion of vessels in spheroid core that are in top 3 networks
16    O(4) = sum_trimmed_top3/sum(P);
17
18    % Proportion of top 3 networks in spheroid core
19    O(5) = sum_trimmed_top3/sum(sortedM(1:3));
20
21    % Proportion of spheroid in spheroid core
22    O(6) = sum(trimmed_islet)/sum(islet);
23
24    % Mean distance to vessel inside spheroid
25    O(7) = meandist2vessel;
26
27    % Proportion of Mean intensities of the main vessel network with the core compared to
28    whole tissue
29    O(8) = Intensity_max/sorted_matrix(1,3);
30

```

```

1      % Proportion of Mean intensities of the top 3 networks with the core compared to whole
2  tissue
3      O(9) = Intensity_top3/mean(sorted_matrix(1:3,3));
4
5      % Proportion of islet volume occupied by main vessel network
6      O(10) = max(M)/sum(islet);
7
8      % Proportion of islet volume occupied by top 3 vessel networks
9      O(11) = sum(sortedM(1:3))/sum(islet);
10
11     % Proportion of islet core occupied by main network
12     O(12) = trimmed_max/sum(trimmed_islet);
13
14     % Proportion of islet core occupied by top 3 vessel networks
15     O(13) = sum_trimmed_top3/sum(trimmed_islet);
16
17     % Ratio of surface area of top 3 networks compared to islet volume
18     O(14) = sum(sorted_surfaceareas(1:3))/sum(islet);
19
20     % Ratio of surface area of top 3 networks inside islet core to
21     % volume of islet core
22     O(15) = sum(sorted_surfaceareas_core(1:3))/sum(trimmed_islet);
23
24     % Combined matrix of all statistics for output
25     results_matrix = [N;M;O]';
26
27
28     % Set filename and save label matrix of blood vessels.
29     labeled_image_16bit = uint16(im2mat(labeled_image));
30     tif_name = strcat(oldname(1:end-4),'.tif');

```



```
1     for p = 1:size(img,3)
2         imwrite(labeled_image_16bit(:,:,p),tif_name, 'WriteMode','append');
3     end
4
5
6     % Write out results of connectivity analysis
7     T = table(results_matrix);
8     writetable(T,filepositive);
9
10    else
11        %skips analysis if it finds the results file from a previous run
12        continue;
13    end
14 end
15 cd(matlab_folder);
16 CODE ENDS
```
